# Supplementary material
Source: PubMed Central journal article supplement (PMC8453584)
Supplement: NIHMS1738807-supplement-Supporting_Information.pdf [file NIHMS1738807-supplement-Supporting_Information.pdf]

# Supporting Information

for

## Non-parametric Estimation of Spearman's Rank Correlation with Bivariate Survival Data

by

*Svetlana Eden, Chun Li, Bryan Shepherd*

### Contents

|   |                                                                           |   |
|---|---------------------------------------------------------------------------|---|
| 1 | Web Appendix A: Consistency of $\hat{\rho}_S^H$ with unbounded censoring. | 2 |
| 2 | Web Appendix B: Code and data availability                                | 5 |
| 3 | Web Tables                                                                | 6 |
| 4 | Web Figures                                                               | 8 |

### List of Tables

|   |                                                                                                                         |   |
|---|-------------------------------------------------------------------------------------------------------------------------|---|
| 1 | Bias and RMSE of $\hat{\rho}_S^H$ and $\hat{\rho}_{IMI}$ for $\rho_S$ under unbounded censoring . . . . .               | 6 |
| 2 | Power and type I error rate of $\hat{\rho}_S^H$ and $\hat{\rho}_{IMI}$ for $\rho_S$ under unbounded censoring . . . . . | 7 |

### List of Figures

|   |                                                                                                                                                                                                                                                                                      |    |
|---|--------------------------------------------------------------------------------------------------------------------------------------------------------------------------------------------------------------------------------------------------------------------------------------|----|
| 1 | Performance of $\hat{\rho}_S^H$ and $\hat{\rho}_{IMI}$ as estimators of the overall Spearman's correlation, $\rho_S$ , performance of $\hat{\rho}_S^H$ as an estimator of $\rho_S^H$ , and performance of $\hat{\rho}_{S \Omega_R}$ as an estimator of $\rho_{S \Omega_R}$ . . . . . | 9  |
| 2 | Performance of $\hat{\rho}_S^H$ with different survival surface estimators under bivariate unbounded censoring                                                                                                                                                                       | 10 |
| 3 | Performance of $\hat{\rho}_S^H$ with different survival surface estimators under univariate unbounded censoring                                                                                                                                                                      | 11 |
| 4 | Efficiency of $\hat{\rho}_S^H$ vs $\hat{\rho}_S^{MLE}$ . . . . .                                                                                                                                                                                                                     | 12 |

|   |                                                                                                                                                                 |    |
|---|-----------------------------------------------------------------------------------------------------------------------------------------------------------------|----|
| 5 | Illustration of the mixture distribution composed of 60% highly negatively and 40% perfectly positively correlated data . . . . .                               | 13 |
| 6 | Performance of $\hat{\rho}_S^H$ , $\hat{\rho}_S^{MLE}$ , and $\hat{\rho}_{IMI}$ under a mixed dependency structure and univariate unbounded censoring . . . . . | 13 |
| 7 | Performance of $\hat{\rho}_{S \Omega_R}$ under a mixed dependency structure and univariate unbounded censoring .                                                | 14 |
| 8 | Coverage probability and average confidence interval length as functions of number of bootstrap samples . . . . .                                               | 15 |

## 1 Web Appendix A: Consistency of $\hat{\rho}_S^H$ with unbounded censoring.

**Lemma A.1.** *Let  $X = \min(T_X, C_X)$ , where random variables  $T_X$  and  $C_X$  are the time to event and time to censoring, respectively. Let  $\Delta_X = \mathbf{1}(T_X \leq C_X)$  and  $V_X = T_X \Delta_X$ . Let  $t_{max,X}$  be the “almost surely” maximum of  $T_X$  such that  $\Pr(T_X > t_{max,X}) = 0$  and  $\Pr(T_X > t) > 0$  for any  $t < t_{max,X}$ , where  $t_{max,X}$  can be infinity. Also assume unbounded censoring, which means that for any  $t$  such that  $\Pr(T_X \geq t) > 0$ ,  $\Pr(T_X \leq C_X | T_X \geq t) > 0$ . Given  $n$  independent and identically distributed pairs  $\{(T_{X,i}, C_{X,i})\}_{i=1}^n$ , let  $V_{X,i} = T_{X,i} \Delta_{X,i}$  and  $V_{max,n,X} = \max(V_{X,1}, \dots, V_{X,n})$ , the largest uncensored event time. Then  $V_{max,n,X} \xrightarrow{p} t_{max,X}$ .*

*Proof.* For brevity we omit the subscript  $X$  in this proof. Because of unbounded censoring and because  $\Pr(T \geq t) \geq \Pr(T > t) > 0$  for any  $0 < t < t_{max}$ , we have  $\Pr(t \leq T \leq C) = \Pr(T \leq C | T \geq t) \Pr(T \geq t) \geq \Pr(T \leq C | T \geq t) \Pr(T > t) > 0$ . Then for  $V = T\Delta$  we have

$$\begin{aligned} \Pr(V < t) &= \Pr(C < T) + \Pr(T < t, T \leq C) \\ &= \Pr(C < T) + \Pr(T \leq C) - \Pr(t \leq T \leq C) \\ &= 1 - \Pr(t \leq T \leq C) < 1. \end{aligned}$$

Given data  $\{(T_i, C_i)\}_{i=1}^n$ , we have  $\Pr(V_{max,n} < t) = \{\Pr(V < t)\}^n \rightarrow 0$  as  $n \rightarrow \infty$ . Because this is true for any  $0 < t < t_{max}$ , for any small  $\varepsilon > 0$ , we have  $\Pr(V_{max,n} < t_{max} - \varepsilon) \rightarrow 0$  as  $n \rightarrow \infty$ . In other words, for any small  $\varepsilon, \delta > 0$ , there exists such  $n^*$  that  $\Pr(|V_{max,n} - t_{max}| > \varepsilon) < \delta$  for any  $n \geq n^*$ . Therefore,  $V_{max,n} \xrightarrow{p} t_{max}$ .  $\square$

**Theorem A.1.** *Under unbounded censoring,  $\hat{\rho}_S^H$  is consistent for  $\rho_S$ , where*

$$\rho_{S/c_\rho} = \int_0^\infty \int_0^\infty \{1 - S_X(x) - S_X(x^-)\} \{1 - S_Y(y) - S_Y(y^-)\} S(dx, dy), \quad (1)$$

$$\hat{\rho}_S^H / \hat{c}_\rho^H = \sum_{i^*} \sum_{j^*} \left\{ 1 - \hat{S}_X^H(x_{i^*}) - \hat{S}_X^H(x_{i^*}^-) \right\} \left\{ 1 - \hat{S}_Y^H(y_{j^*}) - \hat{S}_Y^H(y_{j^*}^-) \right\} \hat{S}^H(dx_{i^*}, dy_{j^*}), \quad (2)$$

$i^*$  enumerates all the events of  $X$  plus  $\hat{\tau}_X$ ,  $j^*$  enumerates all the events of  $Y$  plus  $\hat{\tau}_Y$ ,  $\hat{\tau}_X$  and  $\hat{\tau}_Y$  are points just beyond the largest observed events,  $S_X^H(x)$  and  $S_Y^H(y)$  are the marginal survival functions of  $S^H(x, y)$  (defined in (11) in the main manuscript), and

$$\begin{aligned} c_\rho &= [\text{Var} \{1 - S_X(T_X) - S_X(T_X^-)\} \text{Var} \{1 - S_Y(T_Y) - S_Y(T_Y^-)\}]^{1/2}, \\ \hat{c}_\rho^H &= [\text{Var} \{1 - \hat{S}_X^H(T_X) - \hat{S}_X^H(T_X^-)\} \text{Var} \{1 - \hat{S}_Y^H(T_Y) - \hat{S}_Y^H(T_Y^-)\}]^{1/2}. \end{aligned}$$

*Proof.* The right hand side of (2) can be decomposed as a sum of four terms  $A + B + C + D$ , where

$$\begin{aligned} A &= \sum_i \sum_j \left\{ 1 - \widehat{S}_X(x_i) - \widehat{S}_X(x_i^-) \right\} \left\{ 1 - \widehat{S}_Y(y_j) - \widehat{S}_Y(y_j^-) \right\} \widehat{S}(dx_i, dy_j), \\ B &= \sum_i \left\{ 1 - \widehat{S}_X(x_i) - \widehat{S}_X(x_i^-) \right\} \left\{ 1 - \widehat{S}_Y(\widehat{\tau}_Y^-) \right\} \widehat{S}(dx_i, \widehat{\tau}_Y^-), \\ C &= \sum_j \left\{ 1 - \widehat{S}_X(\widehat{\tau}_X^-) \right\} \left\{ 1 - \widehat{S}_Y(y_j) - \widehat{S}_Y(y_j^-) \right\} \widehat{S}(\widehat{\tau}_X^-, dy_j), \\ D &= \left\{ 1 - \widehat{S}_X(\widehat{\tau}_X^-) \right\} \left\{ 1 - \widehat{S}_Y(\widehat{\tau}_Y^-) \right\} \widehat{S}(\widehat{\tau}_X^-, \widehat{\tau}_Y^-). \end{aligned}$$

Here  $i$  enumerates all the events of  $X$ , and  $j$  enumerates all the events of  $Y$ . It now suffices to show that as  $n \rightarrow \infty$ ,  $A$  converges to the right hand side of (1),  $B \xrightarrow{p} 0$ ,  $C \xrightarrow{p} 0$ ,  $D \xrightarrow{p} 0$ , and  $\widehat{c}_\rho^H \xrightarrow{p} c_\rho$ .

The convergence of  $A$  to the right hand side of (1) follows from the consistency of Dabrowska's estimator (Dabrowska, 1988), the continuous mapping theorem on a metric space of functionals, and the fact that marginal and joint survival functions are from the metric space of functionals with a bounded total variation. (Details are in Section 3.9.4 of van der Vaart and Wellner (1996).)

For the convergence of  $B$ ,  $C$ , and  $D$ , we note that in practice,  $\widehat{S}_X(\widehat{\tau}_X^-) = \widehat{S}_X(V_{max,n,X})$ ,  $\widehat{S}_Y(\widehat{\tau}_Y^-) = \widehat{S}_Y(V_{max,n,Y})$ , and  $\widehat{S}(\widehat{\tau}_X^-, \widehat{\tau}_Y^-) = \widehat{S}(V_{max,n,X}, V_{max,n,Y})$ . Therefore, according to Lemma A.1 and the continuous mapping theorem,  $\widehat{S}_X(\widehat{\tau}_X^-) \xrightarrow{p} S_X(t_{max,X}) = 0$ ,  $\widehat{S}_Y(\widehat{\tau}_Y^-) \xrightarrow{p} 0$ , and  $\widehat{S}(\widehat{\tau}_X^-, \widehat{\tau}_Y^-) \xrightarrow{p} 0$ , which leads to the following:

$$\begin{aligned} B &= \sum_i \left\{ 1 - \widehat{S}_X(x_i) - \widehat{S}_X(x_i^-) \right\} \left\{ 1 - \widehat{S}_Y(\widehat{\tau}_Y^-) \right\} \widehat{S}(dx_i, \widehat{\tau}_Y^-) \\ &\leq \sum_i \widehat{S}(dx_i, \widehat{\tau}_Y^-) = S_Y(\widehat{\tau}_Y^-) - S(\widehat{\tau}_X^-, \widehat{\tau}_Y^-) \xrightarrow{p} 0, \\ C &= \sum_j \left\{ 1 - \widehat{S}_X(\widehat{\tau}_X^-) \right\} \left\{ 1 - \widehat{S}_Y(y_j) - \widehat{S}_Y(y_j^-) \right\} \widehat{S}(\widehat{\tau}_X^-, dy_j) \\ &\leq \sum_j \widehat{S}(\widehat{\tau}_X^-, dy_j) = \widehat{S}_X(\widehat{\tau}_X^-) - \widehat{S}(\widehat{\tau}_X^-, \widehat{\tau}_Y^-) \xrightarrow{p} 0 \\ D &= \left\{ 1 - \widehat{S}_X(\widehat{\tau}_X^-) \right\} \left\{ 1 - \widehat{S}_Y(\widehat{\tau}_Y^-) \right\} \widehat{S}(\widehat{\tau}_X^-, \widehat{\tau}_Y^-) \leq \widehat{S}(\widehat{\tau}_X^-, \widehat{\tau}_Y^-) \xrightarrow{p} 0. \end{aligned}$$

We now show that  $\widehat{c}_\rho^H \xrightarrow{p} c_\rho$ . Let  $Z_X(x) = 1 - \widehat{S}_X^H(x) - \widehat{S}_X^H(x^-)$  and  $Z_Y(y) = 1 - \widehat{S}_Y^H(y) - \widehat{S}_Y^H(y^-)$ . Then  $\widehat{c}_\rho^H$  is the product of the square roots of the sample variances of  $Z_X$  and  $Z_Y$ . The sample means of  $Z_X$  and  $Z_Y$  are zero for any properly defined continuous or discrete survival function (see proof of Property 8 in Li and Shepherd, 2012). Then the sample variance of  $Z_X$  is

$$\begin{aligned} &\sum_{i^*} \left\{ 1 - \widehat{S}_X^H(x_{i^*}) - \widehat{S}_X^H(x_{i^*}^-) \right\}^2 \widehat{S}_X^H(dx_{i^*}) \\ &= \sum_i \left\{ 1 - \widehat{S}_X(x_i) - \widehat{S}_X(x_i^-) \right\}^2 \widehat{S}_X(dx_i) + \left\{ 1 - \widehat{S}_X(\widehat{\tau}_X^-) \right\}^2 \widehat{S}_X(\widehat{\tau}_X^-) \\ &\xrightarrow{p} \int \left\{ 1 - S_X(x) - S_X(x^-) \right\}^2 S_X(dx) + 0 = \text{Var}(1 - S_X(T_X) - S_X(T_X^-)). \end{aligned}$$

Similarly, the sample variance of  $Z_Y$  converges to  $\text{Var}(1 - S_Y(T_Y) - S_Y(T_Y^-))$ . Therefore,  $\widehat{c}_\rho^H \xrightarrow{p} c_\rho$ .

□ 34

**References:**

1. Dabrowska, D. M. (1988). Kaplan–Meier estimate on the plane. *The Annals of Statistics* 16, 1475–1489.
2. Li, C. and Shepherd, B. E. (2012). A new residual for ordinal outcomes. *Biometrika* 99, 473–480.
3. van der Vaart, A. W. and Wellner, J. A. (1996). *Weak Convergence and Empirical Processes*. Springer.

35

36

37

38

## 2 Web Appendix B: Code and data availability

39

We used the following R libraries: `SurvCorr`, `lcopula`, and `cubature`. Complete simulation and analysis code is posted at <https://biostat.app.vumc.org/ArchivedAnalyses>. We have implemented our methods in the R package `survSpearman`.

40

41

42

43

### References:

44

1. Belzile, L. and Genest, C. (2017). *lcopula: Liouville Copulas*. R package version 1.0, <https://CRAN.R-project.org/package=lcopula> (accessed July 9, 2019).

45

46

2. Eden, S. K. and Li, C. and Shepherd, B. E. (2021). *survSpearman: Nonparametric Spearman's Correlation for Survival Data*. R package version 1.0.0, <https://CRAN.R-project.org/package=survSpearman> (accessed January 5, 2021).

47

48

49

3. Narasimhan, B. and Johnson, S. G. (2017). *cubature: Adaptive Multivariate Integration over Hypercubes*. R package version 1.3-8, <https://CRAN.R-project.org/package=cubature> (accessed July 9, 2019).

50

51

4. Ploner, M., Kaider, A., and Heinze, G. (2015). *SurvCorr: Correlation of Bivariate Survival Times*. R package version 1.0, <https://CRAN.R-project.org/package=SurvCorr> (accessed July 9, 2019).

52

53

### 3 Web Tables

**Web Table 1:** Bias [RMSE] of  $\widehat{\rho}_S^H$  and  $\widehat{\rho}_{IMI}$  as estimates of the overall Spearman's correlation,  $\rho_S$ , under unbounded censoring.

| $N$                | Censoring Scenario | Percent Censored | Method       | Indep                       | Clayton        | Frank                       | Frank                      |               |
|--------------------|--------------------|------------------|--------------|-----------------------------|----------------|-----------------------------|----------------------------|---------------|
|                    |                    |                  |              | $\rho_S = 0$                | $\rho_S = 0.2$ | $\rho_S = 0.2$              | $\rho_S = -0.2$            |               |
| 100                | No Censoring       |                  | $\rho_S^H$   | -0.001 [0.103]              | -0.001 [0.100] | -0.005 [0.099]              | 0.002 [0.100]              |               |
|                    |                    |                  | $\rho_{IMI}$ | 0.003 [0.102]               | 0.002 [0.095]  | -0.018 [0.095]              | 0.008 [0.097]              |               |
|                    | $C_X \equiv C_Y$ , | 30%              | $\rho_S^H$   | 0.001 [0.112]               | -0.001 [0.108] | -0.004 [0.110]              | 0.003 [0.109]              |               |
|                    |                    |                  | $\rho_{IMI}$ | 0.001 [0.115]               | 0.032 [0.118]  | -0.002 [0.107]              | 0.000 [0.106]              |               |
|                    |                    | 70%              | $\rho_S^H$   | 0.005 [0.217]               | -0.021 [0.216] | -0.006 [0.219]              | 0.015 [0.215]              |               |
|                    |                    |                  | $\rho_{IMI}$ | -0.004 [0.159]              | 0.091 [0.176]  | -0.002 [0.153]              | 0.017 [0.157]              |               |
|                    | $C_X \perp C_Y$ ,  | (30%, 30%)       | $\rho_S^H$   | 0.003 [0.121]               | -0.004 [0.116] | -0.002 [0.116]              | 0.003 [0.117]              |               |
|                    |                    |                  | $\rho_{IMI}$ | 0.004 [0.117]               | 0.036 [0.118]  | -0.004 [0.111]              | 0.005 [0.110]              |               |
|                    |                    | (30%, 70%)       | $\rho_S^H$   | 0.001 [0.201]               | 0.001 [0.191]  | -0.016 [0.193]              | 0.012 [0.195]              |               |
|                    |                    |                  | $\rho_{IMI}$ | -0.008 [0.142]              | 0.065 [0.156]  | -0.004 [0.138]              | 0.008 [0.139]              |               |
|                    |                    | (70%, 70%)       | $\rho_S^H$   | -0.010 [0.261]              | -0.016 [0.271] | -0.036 [0.278]              | 0.022 [0.260]              |               |
|                    |                    |                  | $\rho_{IMI}$ | -0.007 [0.174] <sup>1</sup> | 0.100 [0.197]  | -0.018 [0.169] <sup>1</sup> | 0.019 [0.179] <sup>2</sup> |               |
|                    | 200                | No Censoring     |              | $\rho_S^H$                  | 0.000 [0.068]  | 0.000 [0.068]               | -0.003 [0.067]             | 0.001 [0.065] |
|                    |                    |                  |              | $\rho_{IMI}$                | 0.001 [0.069]  | 0.012 [0.069]               | -0.012 [0.069]             | 0.008 [0.067] |
| $C_X \equiv C_Y$ , |                    | 30%              | $\rho_S^H$   | 0.002 [0.078]               | 0.000 [0.079]  | -0.003 [0.079]              | 0.002 [0.076]              |               |
|                    |                    |                  | $\rho_{IMI}$ | -0.005 [0.083]              | 0.034 [0.083]  | -0.005 [0.076]              | 0.003 [0.073]              |               |
|                    |                    | 70%              | $\rho_S^H$   | 0.003 [0.164]               | -0.008 [0.159] | 0.001 [0.156]               | 0.008 [0.158]              |               |
|                    |                    |                  | $\rho_{IMI}$ | 0.005 [0.120]               | 0.094 [0.143]  | -0.011 [0.110]              | 0.010 [0.114]              |               |
| $C_X \perp C_Y$ ,  |                    | (30%, 30%)       | $\rho_S^H$   | -0.003 [0.084]              | -0.001 [0.081] | -0.001 [0.082]              | -0.002 [0.081]             |               |
|                    |                    |                  | $\rho_{IMI}$ | 0.001 [0.082]               | 0.040 [0.087]  | -0.006 [0.077]              | 0.004 [0.080]              |               |
|                    |                    | (30%, 70%)       | $\rho_S^H$   | 0.003 [0.148]               | 0.004 [0.139]  | -0.004 [0.145]              | 0.002 [0.148]              |               |
|                    |                    |                  | $\rho_{IMI}$ | -0.002 [0.102]              | 0.081 [0.126]  | -0.010 [0.097]              | 0.014 [0.100]              |               |
|                    |                    | (70%, 70%)       | $\rho_S^H$   | 0.007 [0.231]               | 0.004 [0.209]  | -0.010 [0.217]              | 0.009 [0.214]              |               |
|                    |                    |                  | $\rho_{IMI}$ | 0.003 [0.126]               | 0.115 [0.167]  | -0.012 [0.118]              | 0.015 [0.124]              |               |

<sup>1</sup> In one out of 1000 cases  $\widehat{\rho}_{IMI}$  was not successful in computing the correlation.

<sup>2</sup> In four out of 1000 cases  $\widehat{\rho}_{IMI}$  was not successful in computing the correlation.

**Web Table 2:** Power and type I error rate for the overall Spearman's correlation,  $\rho_S$ , measured by  $\hat{\rho}_S^H$  and  $\hat{\rho}_{IMI}$  under unbounded censoring.

| $N$                | Censoring Scenario | Percent Censored | Method       | Indep              | Clayton        | Frank              | Frank              |       |
|--------------------|--------------------|------------------|--------------|--------------------|----------------|--------------------|--------------------|-------|
|                    |                    |                  |              | $\rho_S = 0$       | $\rho_S = 0.2$ | $\rho_S = 0.2$     | $\rho_S = -0.2$    |       |
| 100                | No Censoring       |                  | $\rho_S^H$   | 0.056              | 0.497          | 0.491              | 0.497              |       |
|                    |                    |                  | $\rho_{IMI}$ | 0.055              | 0.532          | 0.447              | 0.488              |       |
|                    | $C_X \equiv C_Y$ , | 30%              | $\rho_S^H$   | 0.041              | 0.393          | 0.390              | 0.396              |       |
|                    |                    |                  | $\rho_{IMI}$ | 0.042              | 0.533          | 0.397              | 0.415              |       |
|                    |                    | 70%              | $\rho_S^H$   | 0.031              | 0.137          | 0.152              | 0.130              |       |
|                    |                    |                  | $\rho_{IMI}$ | 0.004              | 0.201          | 0.075              | 0.028              |       |
|                    | $C_X \perp C_Y$ ,  | (30%, 30%)       | $\rho_S^H$   | 0.047              | 0.361          | 0.366              | 0.360              |       |
|                    |                    |                  | $\rho_{IMI}$ | 0.040              | 0.516          | 0.362              | 0.350              |       |
|                    |                    | (30%, 70%)       | $\rho_S^H$   | 0.048              | 0.166          | 0.162              | 0.170              |       |
|                    |                    |                  | $\rho_{IMI}$ | 0.013              | 0.311          | 0.132              | 0.129              |       |
|                    |                    | (70%, 70%)       | $\rho_S^H$   | 0.032              | 0.101          | 0.082              | 0.090              |       |
|                    |                    |                  | $\rho_{IMI}$ | 0.001 <sup>1</sup> | 0.132          | 0.017 <sup>1</sup> | 0.010 <sup>2</sup> |       |
|                    | 200                | No Censoring     |              | $\rho_S^H$         | 0.042          | 0.802              | 0.803              | 0.819 |
|                    |                    |                  |              | $\rho_{IMI}$       | 0.039          | 0.858              | 0.756              | 0.792 |
| $C_X \equiv C_Y$ , |                    | 30%              | $\rho_S^H$   | 0.034              | 0.693          | 0.685              | 0.704              |       |
|                    |                    |                  | $\rho_{IMI}$ | 0.054              | 0.828          | 0.680              | 0.691              |       |
|                    |                    | 70%              | $\rho_S^H$   | 0.034              | 0.239          | 0.237              | 0.233              |       |
|                    |                    |                  | $\rho_{IMI}$ | 0.010              | 0.497          | 0.149              | 0.112              |       |
| $C_X \perp C_Y$ ,  |                    | (30%, 30%)       | $\rho_S^H$   | 0.043              | 0.666          | 0.651              | 0.675              |       |
|                    |                    |                  | $\rho_{IMI}$ | 0.043              | 0.837          | 0.657              | 0.630              |       |
|                    |                    | (30%, 70%)       | $\rho_S^H$   | 0.038              | 0.314          | 0.299              | 0.307              |       |
|                    |                    |                  | $\rho_{IMI}$ | 0.018              | 0.657          | 0.291              | 0.283              |       |
|                    |                    | (70%, 70%)       | $\rho_S^H$   | 0.038              | 0.145          | 0.134              | 0.138              |       |
|                    |                    |                  | $\rho_{IMI}$ | 0.001              | 0.391          | 0.071              | 0.037              |       |

<sup>1</sup> In one out of 1000 cases  $\hat{\rho}_{IMI}$  was not successful in computing the correlation.

<sup>2</sup> In four out of 1000 cases  $\hat{\rho}_{IMI}$  was not successful in computing the correlation.

## 4 Web Figures



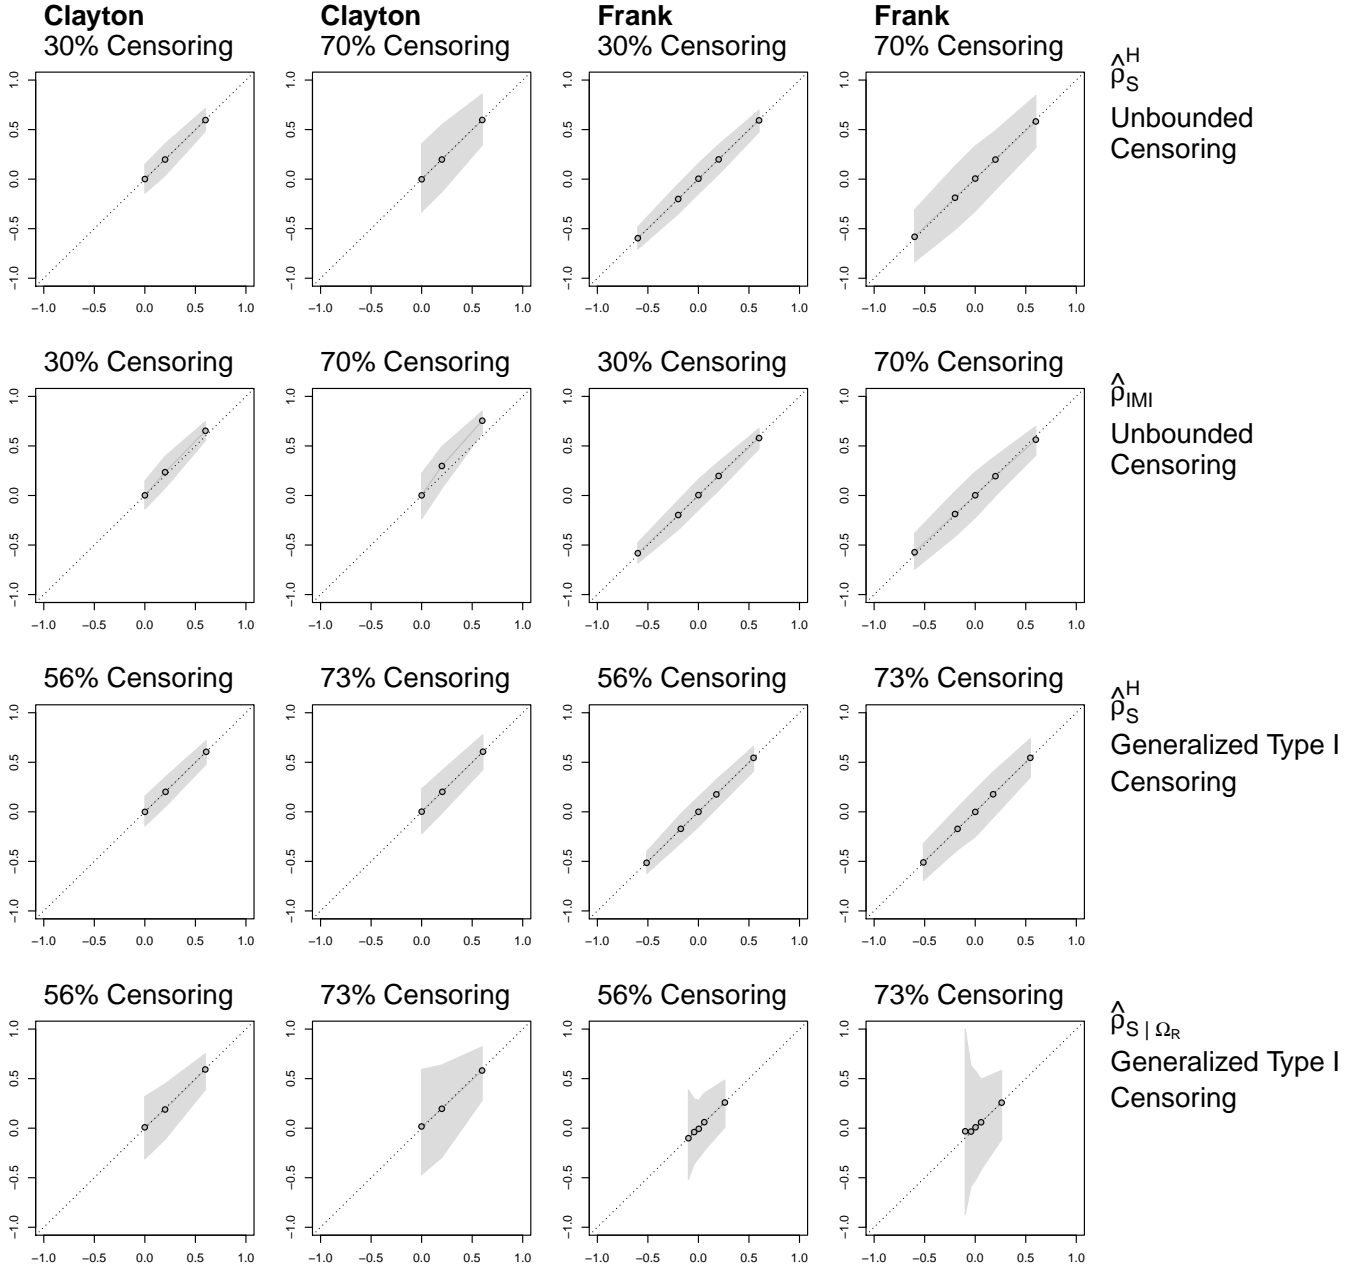

**Web Figure 1:** Point estimates (x-axis) vs population parameters (y-axis) under different univariate censoring scenarios. The top and second rows are  $\hat{\rho}_S^H$  and  $\hat{\rho}_{IMI}$  as estimators of the overall Spearman's correlation,  $\rho_S$ . The third row is  $\hat{\rho}_S^H$  as an estimator of  $\rho_S^H$ . The bottom row is  $\hat{\rho}_{S|\Omega_R}$  as an estimator of  $\rho_{S|\Omega_R}$ . The columns represent Clayton's and Frank's copulas. The population parameters for Clayton's family are 0, 0.2, and 0.6 for all estimates. For Frank's family, the population parameters of  $\rho_S$  are  $-0.6, -0.2, 0.2,$  and  $0.6$ ; the population parameters of  $\rho_S^H$  are  $-0.512, -0.173, 0.180,$  and  $0.545$ ; the population parameters of  $\rho_{S|\Omega_R}$  are  $-0.098, -0.042, 0.058,$  and  $0.261$ . The dots are the mean point estimates based on 1000 simulations. The shaded areas represent the  $0.025^{th}$  and  $0.975^{th}$  quantiles. For generalized type I censoring, the restricted region,  $\Omega_R$ , is defined by the median survival times.

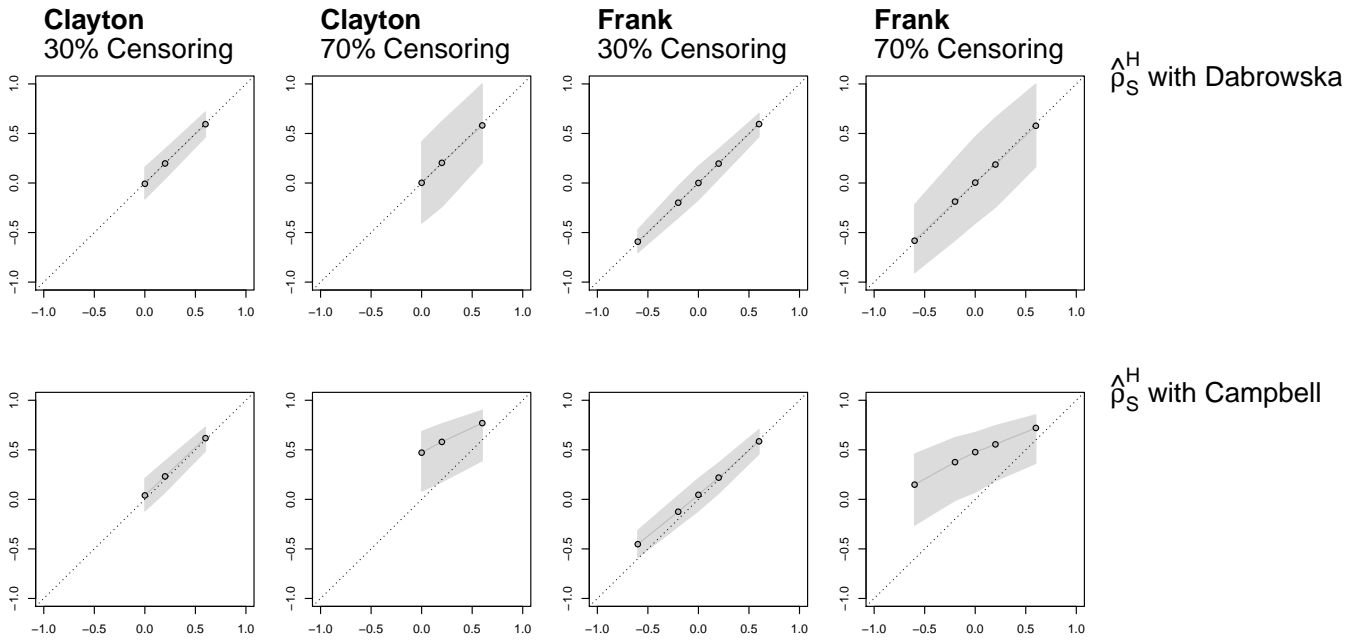

**Web Figure 2:** Performance of  $\hat{\rho}_S^H$  with survival surface estimators of Dabrowska (1988) (top row) and Campbell (1981) (bottom row) under bivariate unbounded censoring. The columns represent Clayton's and Frank's copulas under moderate and heavy censoring. The x-axis is the true overall Spearman's correlation; the y-axis is an estimate. The dots are the mean point estimates based on 1000 simulations. The shaded areas represent the 0.025<sup>th</sup> and 0.975<sup>th</sup> quantiles.

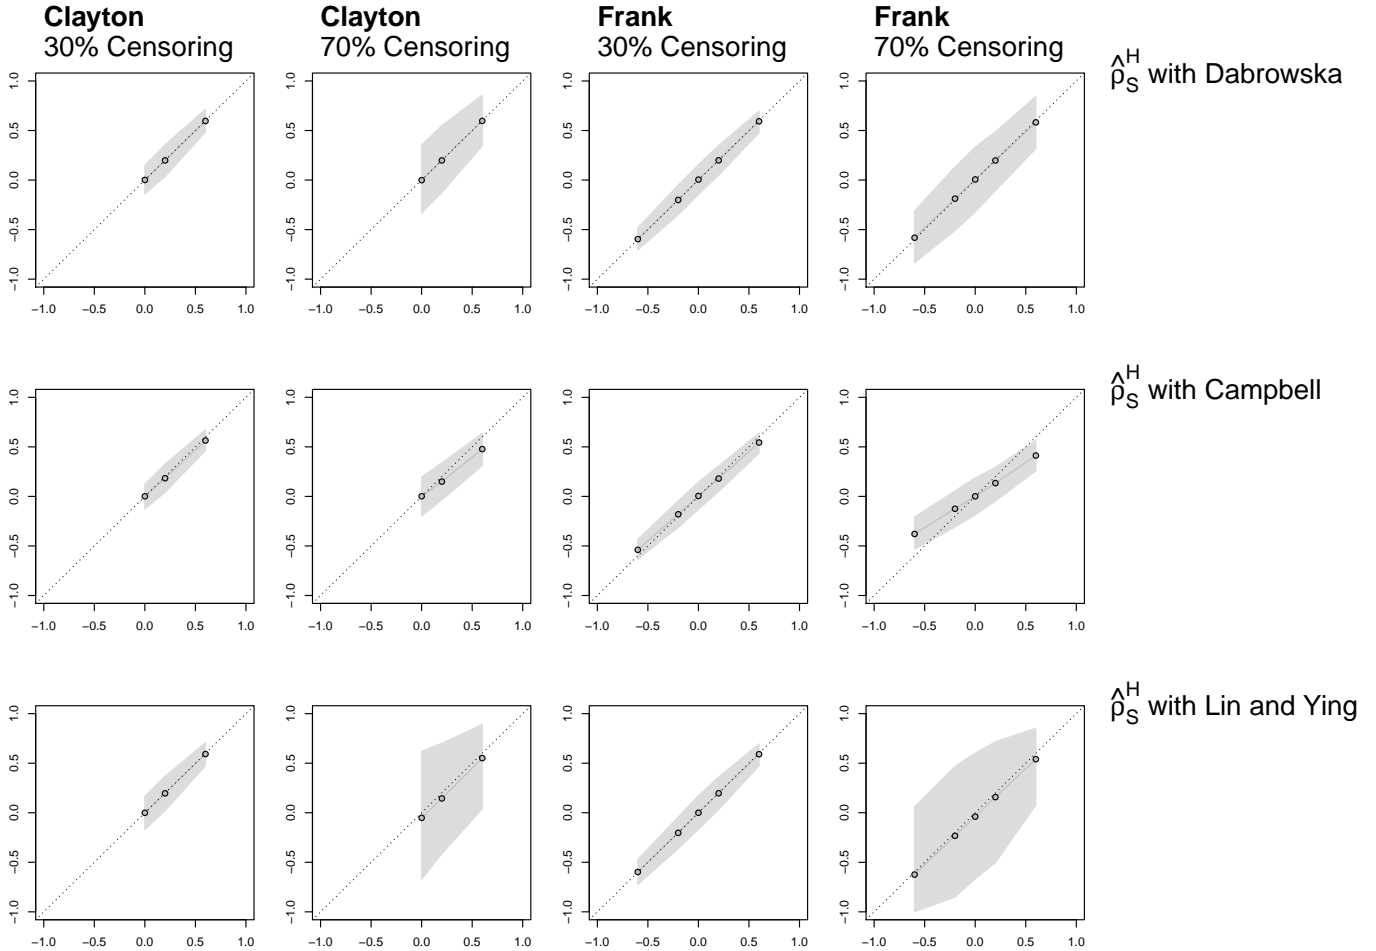

**Web Figure 3:** Performance of  $\hat{\rho}_S^H$  with survival surface estimators of Dabrowska (1988) (top row), Campbell (1981) (middle row), and Lin and Ying (1993) (bottom row) under univariate unbounded censoring. The columns represent Clayton's and Frank's copulas under moderate and heavy censoring. The x-axis is the true overall Spearman's correlation; the y-axis is an estimate. The dots are the mean point estimates based on 1000 simulations. The shaded areas represent the 0.025<sup>th</sup> and 0.975<sup>th</sup> quantiles.

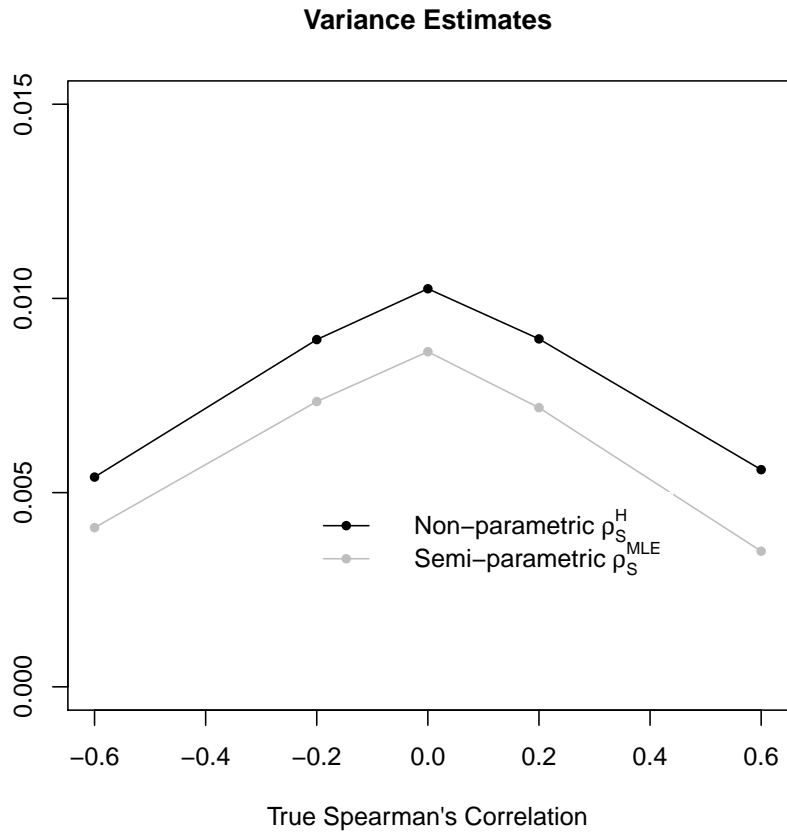

**Web Figure 4:** Efficiency of  $\hat{\rho}_S^H$  vs  $\hat{\rho}_S^{MLE}$ , the maximum likelihood estimator of  $\rho_S$  assuming Frank's copula dependency structure. The black and gray lines are the variances of  $\hat{\rho}_S^H$  vs  $\hat{\rho}_S^{MLE}$  respectively. The data are simulated 1000 times with 200 pairs generated from Frank's copula family; the univariate unbounded censoring at 50% is applied. The relative efficiency  $\text{Var}(\hat{\rho}_S^H)/\text{Var}(\hat{\rho}_S^{MLE})$  ranged from 1.19 (for  $\rho_S = 0$ ) to 1.60 (for  $\rho_S = 0.6$ ).

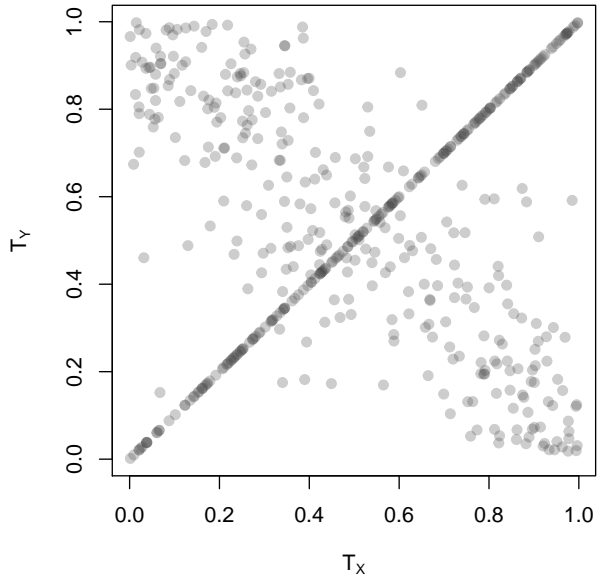

**Web Figure 5:** Illustration of the mixture distribution composed of 60% highly negatively correlated data ( $\rho_S = -0.8$ , Frank's copula family with  $\theta = -8$ ) and 40% perfectly correlated data ( $\rho_S = 1$ ) with the overall Spearman's correlation being about  $-0.0813$ .  $T_X$  and  $T_Y$  are uniformly distributed.

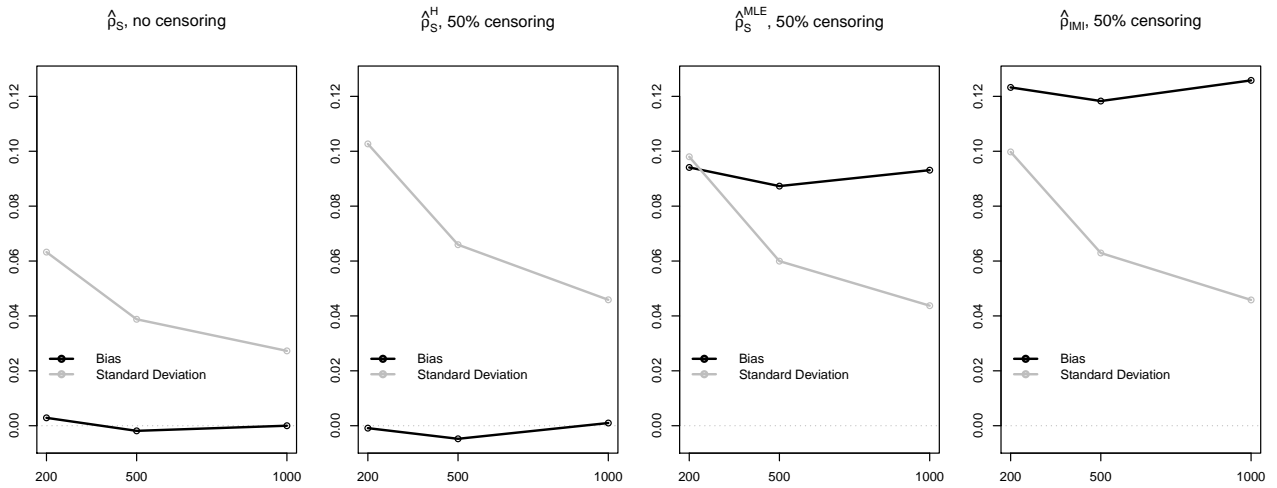

**Web Figure 6:** Bias and standard deviation as functions of the sample size for  $\hat{\rho}_S$  (first panel),  $\hat{\rho}_S^H$  (second panel),  $\hat{\rho}_S^{MLE}$  (third panel), and  $\hat{\rho}_{IMI}$  (fourth panel). Estimator  $\hat{\rho}_S$  is computed as Spearman's rank correlation for uncensored data. Estimators  $\hat{\rho}_S^H$ ,  $\hat{\rho}_S^{MLE}$ , and  $\hat{\rho}_{IMI}$  are computed under 50% random unbounded censoring. The bivariate survival data are simulated as a mixture of 60% highly negatively correlated data ( $\rho_S = -0.8$ , Frank's copula family with  $\theta = -8$ ) and 40% perfectly correlated data ( $\rho_S = 1$ ) with the overall Spearman's correlation being about  $-0.0813$  (see Web Figure 5 for illustration).

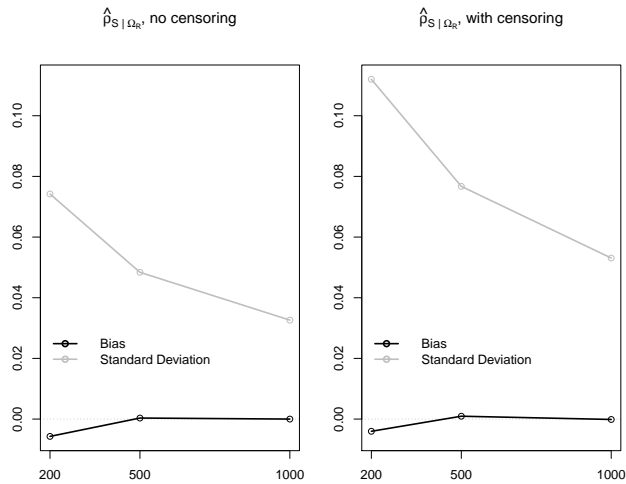

**Web Figure 7:** Bias and standard deviation as functions of the sample size for estimates of Spearman's correlation within the restricted region with no censoring and therefore using standard methods (left panel) and with censoring and therefore computing  $\hat{\rho}_S | \Omega_R$  (right panel) as described in Section 3.1. Estimator  $\hat{\rho}_S$  is computed as Spearman's rank correlation for uncensored pairs with each event time less than the median event time. The restricted region  $\Omega_R$  is defined by the median follow-up time for both times to event. The bivariate survival data are simulated as a mixture of 60% highly negatively correlated data ( $\rho_S = -0.8$ , Frank's copula family with  $\theta = -8$ ) and 40% perfectly correlated data ( $\rho_S = 1$ ) with the true overall and restricted Spearman's correlations being about  $-0.081$  and  $0.85$  respectively. Unbounded 50% censoring is applied to the entire sample. The effective proportion of uncensored events for  $\hat{\rho}_S | \Omega_R$  is 25% for each time to event (Web Figure 5 illustrates an uncensored sample).

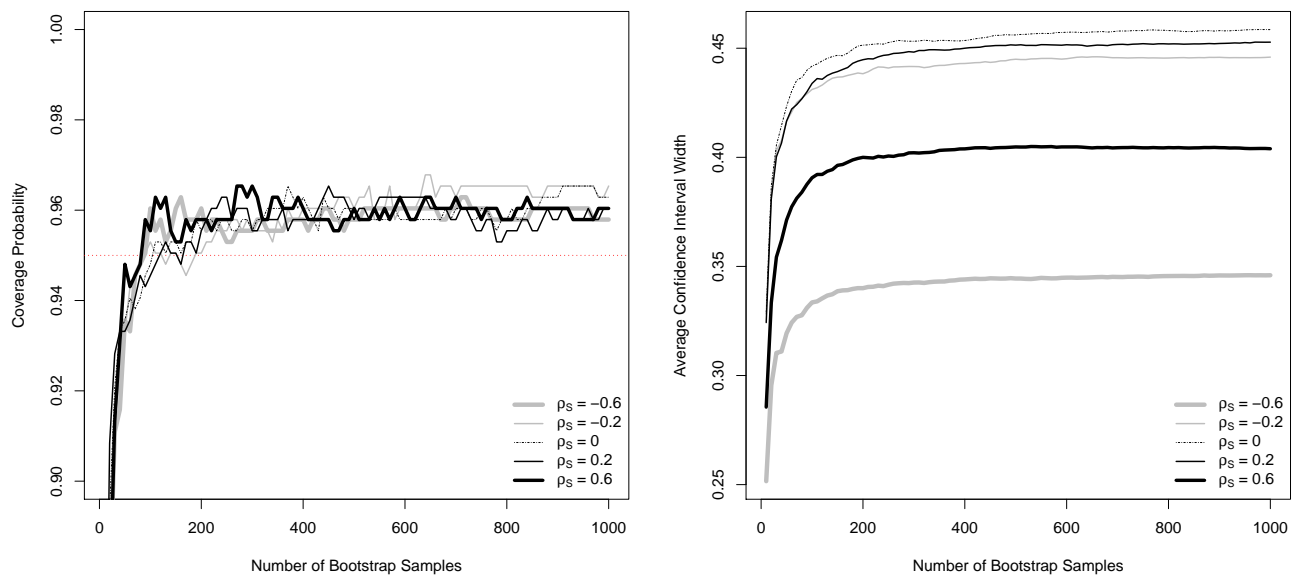

**Web Figure 8:** Coverage probability (left panel) and average width (right panel) of the bootstrap confidence intervals for  $\hat{\rho}_S^H$  as an estimate of  $\rho_S$  under 50% unbounded censoring. The data are simulated from Frank's copula with parameters corresponding to Spearman's correlation of  $-0.6$ ,  $-0.2$ ,  $0$ ,  $0.2$ , and  $0.6$ . The sample size is 200 and the number of simulations is 1000. The 95% bootstrap confidence bounds are computed as the 0.025<sup>th</sup> and 0.975<sup>th</sup> percentiles.
